# Supplementary material for: Wild-Type Hras Suppresses the Earliest Stages of Tumorigenesis in a Genetically Engineered Mouse Model of Pancreatic Cancer
Source: PubMed Central journal article supplement (PMC4599940; doi:10.1371/journal.pone.0140253), 2015-10-09

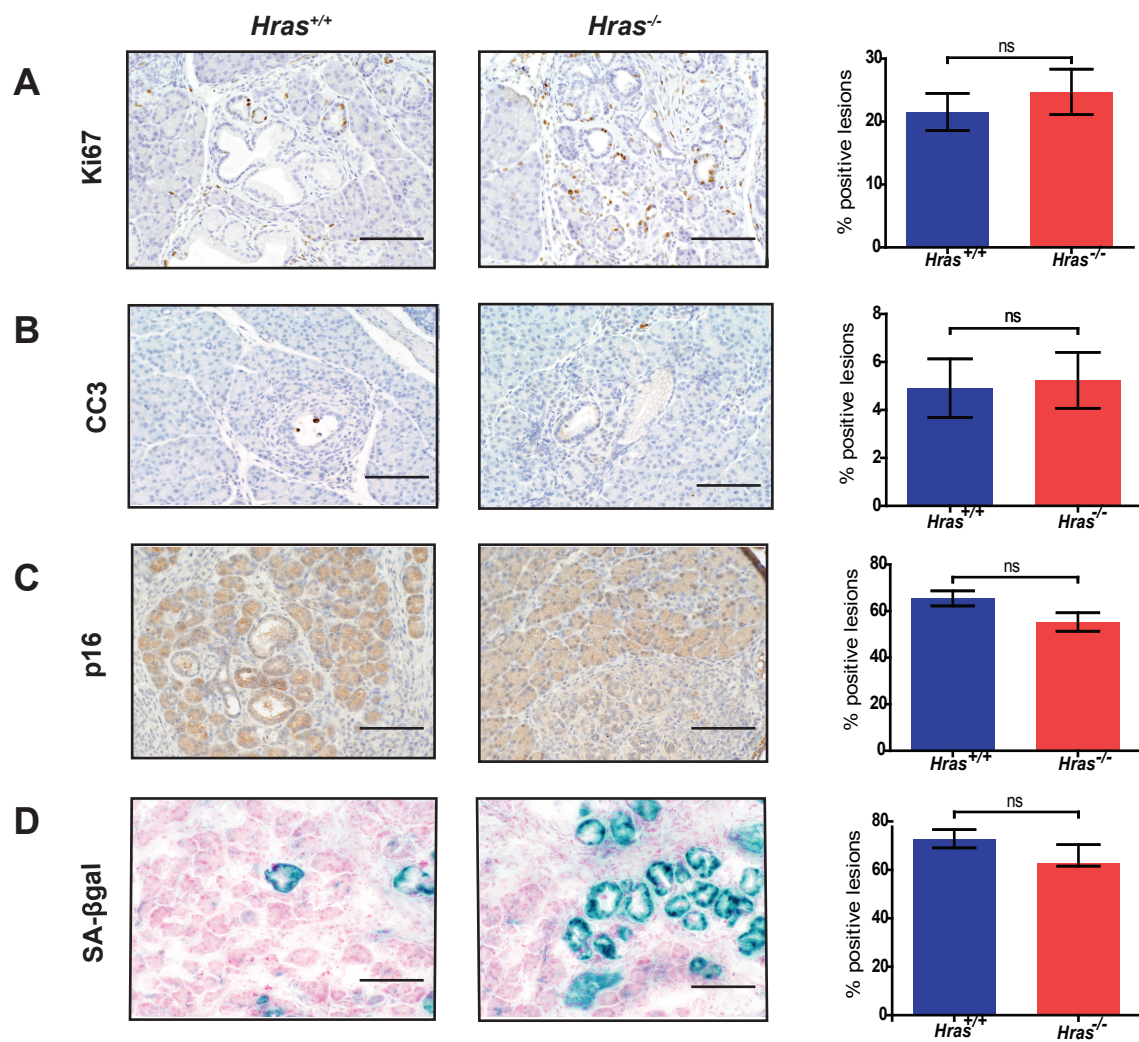

Supplement: pone.0140253.s002.pdf [file pone.0140253.s002.pdf]
